# Supplementary material
Source: PubMed Central journal article supplement (PMC7454847)
Supplement: hcaa209_supplementary_data.pdf [file hcaa209_supplementary_data.pdf]

**Appendix Table 1.** All variables in each prefecture.

| <b>Prefecture</b> | <b>Positive number</b> | <b>RT-PCR testing</b> | <b>Deaths</b> | <b>population (100,000)</b> | <b>Chinese visitors per 100,000</b> | <b>Physicians per 100,000</b> | <b>Available beds for type 2 infection</b> | <b>Nurses per 100,000</b> | <b>Positive number per 100,000</b> | <b>RT-PCR testing per 100,000</b> | <b>Cluster infection</b> | <b>US Force Japan facility</b> |
|-------------------|------------------------|-----------------------|---------------|-----------------------------|-------------------------------------|-------------------------------|--------------------------------------------|---------------------------|------------------------------------|-----------------------------------|--------------------------|--------------------------------|
| Hokkaido          | 194                    | 2445                  | 9             | 53                          | 16,696                              | 243.1                         | 92                                         | 1,219.4                   | 3.7                                | 46.3                              | 2                        | 1                              |
| Aomori            | 11                     | 233                   | 0             | 13                          | 1,926                               | 203.3                         | 28                                         | 1,033.1                   | 0.9                                | 18.4                              | 0                        | 4                              |
| Iwate             | 0                      | 86                    | 0             | 12                          | 299                                 | 201.7                         | 36                                         | 1,098.9                   | 0.0                                | 6.9                               | 0                        | 0                              |
| Miyagi            | 26                     | 514                   | 0             | 23                          | 762                                 | 238.4                         | 27                                         | 867.3                     | 1.1                                | 22.2                              | 1                        | 0                              |
| Akita             | 11                     | 419                   | 0             | 10                          | 733                                 | 234.0                         | 30                                         | 1,153.0                   | 1.1                                | 42.7                              | 0                        | 0                              |
| Yamagata          | 13                     | 434                   | 0             | 11                          | 501                                 | 226.0                         | 16                                         | 1,076.2                   | 1.2                                | 39.8                              | 0                        | 0                              |
| Fukushima         | 16                     | 328                   | 0             | 19                          | 402                                 | 204.9                         | 34                                         | 920.7                     | 0.9                                | 17.6                              | 0                        | 0                              |
| Ibaraki           | 71                     | 1806                  | 2             | 29                          | 478                                 | 187.5                         | 46                                         | 765.5                     | 2.5                                | 62.8                              | 2                        | 0                              |
| Tochigi           | 14                     | 759                   | 0             | 19                          | 1,685                               | 226.1                         | 30                                         | 846.8                     | 0.7                                | 39.0                              | 0                        | 0                              |
| Gunma             | 26                     | 1361                  | 1             | 20                          | 492                                 | 228.3                         | 50                                         | 974.5                     | 1.3                                | 69.7                              | 2                        | 0                              |
| Saitama           | 195                    | 1647                  | 4             | 73                          | 449                                 | 169.8                         | 66                                         | 693.6                     | 2.7                                | 22.5                              | 0                        | 3                              |

|           |       |      |    |     |        |       |     |         |     |      |   |    |
|-----------|-------|------|----|-----|--------|-------|-----|---------|-----|------|---|----|
| Chiba     | 253   | 1297 | 1  | 63  | 5,658  | 194.1 | 55  | 722.7   | 4.0 | 20.7 | 2 | 1  |
| Tokyo     | 1,123 | 4422 | 16 | 138 | 18,332 | 307.5 | 106 | 792.3   | 8.1 | 32.0 | 4 | 6  |
| Kanagawa  | 261   | 1799 | 6  | 92  | 5,946  | 212.4 | 72  | 738.4   | 2.8 | 19.6 | 2 | 11 |
| Niigata   | 32    | 1345 | 0  | 22  | 765    | 197.9 | 34  | 1,010.8 | 1.4 | 59.9 | 1 | 0  |
| Toyama    | 11    | 381  | 0  | 11  | 2,958  | 254.4 | 20  | 1,211.1 | 1.0 | 36.3 | 0 | 0  |
| Ishikawa  | 45    | 384  | 0  | 11  | 2,296  | 284.1 | 18  | 1,278.7 | 3.9 | 33.6 | 0 | 0  |
| Fukui     | 57    | 335  | 2  | 8   | 1,072  | 252.6 | 18  | 1,161.8 | 7.4 | 43.3 | 0 | 0  |
| Yamanashi | 14    | 749  | 0  | 8   | 46,852 | 239.2 | 28  | 1,006.5 | 1.7 | 91.7 | 0 | 0  |
| Nagano    | 14    | 736  | 0  | 21  | 2,781  | 233.1 | 44  | 1,083.3 | 0.7 | 35.7 | 0 | 0  |
| Gifu      | 51    | 966  | 1  | 20  | 4,024  | 215.1 | 28  | 848.8   | 2.6 | 48.4 | 1 | 0  |
| Shizuoka  | 10    | 1203 | 0  | 37  | 15,453 | 210.2 | 46  | 900.1   | 0.3 | 32.9 | 0 | 2  |
| Aichi     | 237   | 3236 | 21 | 75  | 7,430  | 212.9 | 68  | 814.5   | 3.1 | 42.9 | 2 | 0  |
| Mie       | 13    | 759  | 0  | 18  | 1,360  | 223.4 | 22  | 945.3   | 0.7 | 42.4 | 0 | 0  |
| Shiga     | 18    | 334  | 0  | 14  | 980    | 227.6 | 32  | 999.0   | 1.3 | 23.7 | 0 | 0  |
| Kyoto     | 119   | 1472 | 0  | 26  | 63,231 | 323.3 | 36  | 1,089.8 | 4.6 | 56.8 | 1 | 1  |
| Osaka     | 429   | 1751 | 3  | 88  | 21,039 | 277.0 | 72  | 942.0   | 4.9 | 19.9 | 1 | 0  |
| Hyogo     | 201   | 3054 | 12 | 55  | 2,750  | 252.2 | 46  | 996.7   | 3.7 | 55.7 | 4 | 0  |

|           |     |      |   |    |        |       |    |         |     |       |   |    |
|-----------|-----|------|---|----|--------|-------|----|---------|-----|-------|---|----|
| Nara      | 26  | 374  | 0 | 13 | 39,029 | 258.5 | 22 | 964.7   | 1.9 | 27.9  | 0 | 0  |
| Wakayama  | 27  | 1642 | 1 | 9  | 2,900  | 302.1 | 30 | 1,154.5 | 2.9 | 175.6 | 0 | 0  |
| Tottori   | 0   | 242  | 0 | 6  | 1,185  | 304.8 | 10 | 1,282.1 | 0.0 | 43.2  | 0 | 0  |
| Shimane   | 0   | 166  | 0 | 7  | 553    | 286.3 | 28 | 1,289.6 | 0.0 | 24.4  | 0 | 0  |
| Okayama   | 11  | 479  | 0 | 19 | 1,147  | 308.2 | 24 | 1,239.4 | 0.6 | 25.2  | 0 | 0  |
| Hiroshima | 16  | 1348 | 0 | 28 | 966    | 258.6 | 28 | 1,102.1 | 0.6 | 47.9  | 0 | 5  |
| Yamaguchi | 12  | 449  | 0 | 14 | 517    | 252.9 | 38 | 1,263.6 | 0.9 | 32.8  | 0 | 2  |
| Tokushima | 3   | 174  | 0 | 7  | 1,186  | 329.5 | 21 | 1,235.2 | 0.4 | 23.6  | 0 | 0  |
| Kagawa    | 2   | 371  | 0 | 10 | 3,006  | 282.5 | 22 | 1,195.5 | 0.2 | 38.6  | 0 | 0  |
| Ehime     | 14  | 407  | 1 | 14 | 698    | 269.2 | 26 | 1,245.5 | 1.0 | 30.1  | 0 | 0  |
| Kochi     | 34  | 565  | 0 | 7  | 944    | 316.9 | 9  | 1,511.0 | 4.8 | 80.0  | 0 | 0  |
| Fukuoka   | 113 | 2415 | 0 | 51 | 2,655  | 302.6 | 64 | 1,189.2 | 2.2 | 47.3  | 0 | 1  |
| Saga      | 8   | 223  | 0 | 8  | 2,771  | 280.0 | 22 | 1,335.4 | 1.0 | 27.2  | 0 | 0  |
| Nagasaki  | 9   | 665  | 0 | 13 | 3,398  | 306.3 | 36 | 1,319.2 | 0.7 | 49.6  | 0 | 10 |
| Kumamoto  | 20  | 1420 | 0 | 18 | 2,826  | 289.8 | 46 | 1,309.7 | 1.1 | 80.8  | 0 | 0  |
| Oita      | 32  | 1843 | 0 | 11 | 8,164  | 275.2 | 38 | 1,276.2 | 2.8 | 161.1 | 1 | 0  |
| Miyazaki  | 7   | 425  | 0 | 11 | 760    | 246.6 | 30 | 1,298.1 | 0.6 | 39.3  | 0 | 0  |

|           |      |       |    |      |        |       |      |         |     |      |    |    |
|-----------|------|-------|----|------|--------|-------|------|---------|-----|------|----|----|
| Kagoshima | 3    | 414   | 0  | 16   | 1,588  | 270.8 | 44   | 1,394.3 | 0.2 | 25.7 | 0  | 0  |
| Okinawa   | 15   | 480   | 0  | 14   | 44,865 | 240.7 | 20   | 1,060.6 | 1.0 | 33.1 | 0  | 31 |
| Total     | 3817 | 48357 | 80 | 1264 |        |       | 1758 |         | 3.0 | 38.2 | 26 | 78 |

For Review Only

**Appendix Table 2.** Demographic characteristics of each variable

|    | Variables                                        | Median (interquartile range [IQR]) |
|----|--------------------------------------------------|------------------------------------|
| 1  | Death*                                           | 0 (0-1)                            |
| 2  | Positives **                                     | 16 (11-54)                         |
| 3  | Number of RT-PCR testing**                       | 665 (382.5-1446)                   |
| 4  | Available beds for type 2 infection              | 30 (23-46)                         |
| 5  | Population (100,000)                             | 16.14 (10.86-27.04)                |
| 6  | Number of physicians per 100,000 population      | 252.2 (224.7-283.3)                |
| 7  | Number of nurses per 100,000 population          | 1089.8 (943.65-1242.45)            |
| 8  | Chinese visitors to Japan per 100,000 population | 1925.7 (763.4-4840.7)              |
| 9  | Number of positives per 100,000 population*      | 1.138 (0.70-2.82)                  |
| 10 | Number of RT-PCR testing per 100,000 population* | 38.6 (25.4-48.1)                   |
| 11 | Number of US Force Japan facilities              | 0 (0-1)                            |
| 12 | Number of clusters                               | 0 (0-1)                            |

\* Number of cases reported by prefecture in Japan (as of 12:00 on March 15, 2020).

Excluding charter flights and cruise ship patients.

1  
2  
3  
4  
5  
6 \*\* Number of new coronavirus-positive persons and number of persons performing PCR  
7  
8 testing (does this mean lab technicians, i.e. people running the tests?) (by prefecture)  
9  
10 (published on March 15, 2020). This is excluding those returning from charter flights.  
11  
12  
13  
14  
15  
16  
17  
18  
19  
20  
21  
22  
23  
24  
25  
26  
27  
28  
29  
30  
31  
32  
33  
34  
35  
36  
37  
38  
39  
40  
41  
42  
43  
44  
45  
46  
47  
48  
49  
50  
51  
52  
53  
54  
55  
56  
57  
58  
59  
60

For Review Only
